# Supplementary material
Source: MDPI journal article supplement (https://www.mdpi.com/2543-6031/91/6/41)
Supplement: s1 [file s1]

## Supplementary Material

**Table S1.**

| Search strategy                                                                                                                                                                                                                                                                                                                                                                                                                                                                                                                                                                                                                                                                                                                                                                                                                                                                                                                                                                                                 |
|-----------------------------------------------------------------------------------------------------------------------------------------------------------------------------------------------------------------------------------------------------------------------------------------------------------------------------------------------------------------------------------------------------------------------------------------------------------------------------------------------------------------------------------------------------------------------------------------------------------------------------------------------------------------------------------------------------------------------------------------------------------------------------------------------------------------------------------------------------------------------------------------------------------------------------------------------------------------------------------------------------------------|
| <b>PUBMED</b>                                                                                                                                                                                                                                                                                                                                                                                                                                                                                                                                                                                                                                                                                                                                                                                                                                                                                                                                                                                                   |
| ("sars cov 2"[MeSH Terms] OR "sars cov 2"[All Fields] OR "covid"[All Fields] OR "covid 19"[MeSH Terms] OR "covid 19"[All Fields] OR ("sars cov 2"[MeSH Terms] OR "sars cov 2"[All Fields] OR "sars cov 2"[All Fields]) OR ("covid 19"[MeSH Terms] OR "covid 19"[All Fields] OR "coronavirus disease 2019"[All Fields]) OR ("sars cov 2"[MeSH Terms] OR "sars cov 2"[All Fields] OR "ncov"[All Fields])) AND ("reinfect"[All Fields] OR "reinfected"[All Fields] OR "reinfection"[MeSH Terms] OR "reinfection"[All Fields] OR "reinfected"[All Fields] OR "reinfections"[All Fields] OR "reinfected"[All Fields] OR ("latent infection"[MeSH Terms] OR ("latent"[All Fields] AND "infection"[All Fields]) OR "latent infection"[All Fields] OR ("reactivated"[All Fields] AND "infection"[All Fields]) OR "reactivated infection"[All Fields]) OR ("second"[All Fields] OR "seconds"[All Fields]) AND ("episode"[All Fields] OR "episodes"[All Fields] OR "episodic"[All Fields] OR "episodically"[All Fields])) |
| <b>SCOPUS</b>                                                                                                                                                                                                                                                                                                                                                                                                                                                                                                                                                                                                                                                                                                                                                                                                                                                                                                                                                                                                   |
| TITLE-ABS-KEY ( coronavir* OR "corona virus" OR "corona pandemic" OR betacoronavir* OR covid19 OR covid OR ncov OR "CoV2" OR coV2 OR sarscoV2 OR sarS2 OR 2019ncov OR "novel CoV" ) OR TITLE-ABS-KEY(sars AND cov) AND (TITLE-ABS-KEY( "severe acute respiratory" OR pneumonia* OR infection OR "respiratory infectious disease")) AND (TITLE-ABS-KEY(reinfection*OR "secondary infection")) AND ( LIMIT-TO ( PUBYEAR , 2021 ) OR LIMIT-TO ( PUBYEAR , 2020 ) ) AND( LIMIT-TO( DOCTYPE , "ar" ) )                                                                                                                                                                                                                                                                                                                                                                                                                                                                                                               |

**Table S2. JBI assessment results of studies**

| <b>Countr<br/>y</b> | <b>Publicati<br/>on date</b> | <b>Author</b>                                                     | <b>1. Were<br/>the<br/>criteria<br/>for<br/>includi<br/>on in<br/>the<br/>sample<br/>clearly<br/>defined<br/>?</b> | <b>2. Were<br/>the<br/>study<br/>subjects<br/>and the<br/>setting<br/>describe<br/>d in<br/>detail?</b> | <b>3. Was<br/>the<br/>exposur<br/>e<br/>measure<br/>d in a<br/>valid<br/>and<br/>reliable<br/>way?</b> | <b>4. Were<br/>objective,<br/>standard<br/>criteria<br/>used for<br/>measur<br/>ement of the<br/>condition<br/>?</b> | <b>5. Were<br/>confoun<br/>ding<br/>factors<br/>identifie<br/>d?</b> | <b>6. Were<br/>strategies<br/>to deal<br/>with<br/>confoun<br/>ding<br/>factors<br/>stated?</b> | <b>7. Were<br/>the<br/>outcome<br/>s<br/>measure<br/>d in a<br/>valid<br/>and<br/>reliable<br/>way?</b> | <b>8. Was<br/>appropri<br/>ate<br/>statistic<br/>al<br/>analysis<br/>used?</b> | <b>Total</b> |
|---------------------|------------------------------|-------------------------------------------------------------------|--------------------------------------------------------------------------------------------------------------------|---------------------------------------------------------------------------------------------------------|--------------------------------------------------------------------------------------------------------|----------------------------------------------------------------------------------------------------------------------|----------------------------------------------------------------------|-------------------------------------------------------------------------------------------------|---------------------------------------------------------------------------------------------------------|--------------------------------------------------------------------------------|--------------|
| Italy               | May-22                       | Sacco C,<br>Petrone D, Del<br>Manso M, et al.<br>[24]             | 1                                                                                                                  | 0                                                                                                       | 1                                                                                                      | 1                                                                                                                    | 1                                                                    | 0                                                                                               | 1                                                                                                       | 1                                                                              | <b>6</b>     |
| Italy               | May-22                       | Flacco ME,<br>Soldato G,<br>Acuti<br>Martellucci C,<br>et al.[25] | 1                                                                                                                  | 0                                                                                                       | 1                                                                                                      | 1                                                                                                                    | 1                                                                    | 1                                                                                               | 1                                                                                                       | 0                                                                              | <b>6</b>     |

|              |               |                                                                         |   |   |   |   |   |   |   |   |   |
|--------------|---------------|-------------------------------------------------------------------------|---|---|---|---|---|---|---|---|---|
| Saudi Arabia | April 2022    | Shaheen NA, Sambas R, Alenezi M, Alharbi NK, Aldibasi O, Bosaeed M [26] | 1 | 1 | 1 | 1 | 1 | 0 | 1 | 1 | 7 |
| Sweden       | April 2022    | Nordström P, Ballin M, Nordström A [27]                                 | 1 | 0 | 1 | 1 | 1 | 0 | 1 | 1 | 6 |
| USA          | August 2021   | Slezak J, Bruxvoort K, Fischer H, Broder B, Ackerson B, Tartof S [28]   | 1 | 0 | 1 | 1 | 1 | 1 | 1 | 1 | 7 |
| England      | April 2022    | Mensah AA, Lacy J, Stowe J, et al.[29]                                  | 1 | 1 | 1 | 1 | 1 | 1 | 1 | 1 | 8 |
| China        | December 2020 | Yao MQ, Zheng QX, Xu J, et al. [30]                                     | 1 | 0 | 1 | 1 | 1 | 1 | 1 | 0 | 6 |

|                       |             |                                                                                     |   |   |   |   |   |   |   |   |   |
|-----------------------|-------------|-------------------------------------------------------------------------------------|---|---|---|---|---|---|---|---|---|
| South Africa          | March 2022  | Pulliam JRC, van Schalkwyk C, Govender N, et al. [31]                               | 1 | 1 | 1 | 1 | 1 | 1 | 1 | 1 | 8 |
| Bahrain (Middle East) | August 2022 | Almadhi M, Alsayyad AS, Conroy R, Atkin S, Awadhi AA, Al-Tawfiq JA, AlQahtani M [3] | 1 | 0 | 1 | 1 | 0 | 0 | 1 | 1 | 5 |
| Saudi Arabia          | July 2022   | Al-Otaiby M, et al.[32]                                                             | 1 | 1 | 1 | 1 | 1 | 1 | 1 | 1 | 8 |
| Mexico                | April 2021  | Murillo-Zamora E, Mendoza-Cano O, Delgado-Enciso I, Hernandez-Suarez CM [33]        | 1 | 1 | 1 | 1 | 0 | 1 | 1 | 1 | 7 |

|                    |              |                                                               |   |   |   |   |   |   |   |   |   |
|--------------------|--------------|---------------------------------------------------------------|---|---|---|---|---|---|---|---|---|
| Spain              | January 2022 | Sánchez-Varela N, Cinza-Sanjurjo S, Portela-Romero M [35]     | 1 | 1 | 1 | 1 | 0 | 0 | 1 | 1 | 6 |
| China              | May-20       | Hu R, Jiang Z, Gao H, et al. [36]                             | 1 | 0 | 1 | 1 | 1 | 1 | 1 | 0 | 6 |
| Republic of Cyprus | March 2022   | Quattrocchi A, Tsioutis C, Demetriou A, et al. [37]           | 1 | 1 | 1 | 1 | 0 | 1 | 1 | 1 | 7 |
| USA                | August 2021  | Cavanaugh AM, Spicer KB, Thoroughman D, Glick C, Winter K[38] | 1 | 1 | 1 | 1 | 1 | 0 | 1 | 1 | 7 |

|         |                  |                                                                             |   |   |   |   |   |   |   |   |   |
|---------|------------------|-----------------------------------------------------------------------------|---|---|---|---|---|---|---|---|---|
| Serbia  | July 2022        | Medić S,<br>Anastassopoul<br>ou C, Lozanov-<br>Crvenković Z,<br>et al. [39] | 1 | 1 | 1 | 1 | 0 | 1 | 1 | 1 | 7 |
| Austria | February<br>2021 | Pilz S, Chakeri<br>A, Ioannidis JP,<br>et al. [40]                          | 1 | 1 | 1 | 1 | 1 | 1 | 1 | 0 | 7 |
| Brazil  | February<br>2021 | Adrielle Dos<br>Santos L, Filho<br>PGG, Silva<br>AMF, et al. [41]           | 1 | 1 | 1 | 1 | 0 | 1 | 1 | 1 | 7 |
| Sweden  | January<br>2020  | Havervall S,<br>Ng H, Jernbom<br>Falk A, et<br>al.[42]                      | 1 | 0 | 1 | 1 | 1 | 0 | 1 | 0 | 5 |

|                   |              |                                                                                        |   |   |   |   |   |   |   |   |   |
|-------------------|--------------|----------------------------------------------------------------------------------------|---|---|---|---|---|---|---|---|---|
| India             | January 2022 | Nisha B, Dakshinamoorthy K, Padmanaban P, Jain T, Neelavarnan M.[43]                   | 1 | 1 | 1 | 1 | 0 | 1 | 1 | 1 | 7 |
| USA               | May-22       | Levin-Rector A, Firestein L, McGibbon E, et al. [44]                                   | 1 | 1 | 1 | 1 | 1 | 0 | 1 | 1 | 7 |
| Several countries | August 2021  | Sotoodeh Ghorbani S, Taherpour N, Bayat S, Ghajari H, Mohseni P, Hashemi Nazari SS [8] | 1 | 0 | 1 | 1 | 0 | 1 | 1 | 1 | 6 |

|         |            |                                                         |   |   |   |   |   |   |   |   |   |
|---------|------------|---------------------------------------------------------|---|---|---|---|---|---|---|---|---|
| France  | March 2022 | Nguyen NN, Houhamdi L, Hoang VT, et al. [45]            | 1 | 1 | 1 | 1 | 0 | 1 | 1 | 1 | 7 |
| England | March 2022 | Mensah AA, Campbell H, Stowe J, et al.[46]              | 1 | 0 | 1 | 1 | 1 | 1 | 1 | 0 | 6 |
| Mexico  | June 2022  | Ochoa-Hein E, Leal-Morán PE, Nava-Guzmán KA, et al.[47] | 1 | 1 | 1 | 1 | 0 | 0 | 1 | 1 | 6 |



Table S2: Newcastle–Ottawa Scale (NOS) Risk of Bias Assessment Results

| Study ID                                                               | Selection                                |                                     |                               | Comparability* | Outcome                   |                           | Total (7★)    |
|------------------------------------------------------------------------|------------------------------------------|-------------------------------------|-------------------------------|----------------|---------------------------|---------------------------|---------------|
|                                                                        | Representativeness of exposed cohort (★) | Selection of non-exposed cohort (★) | Ascertainment of exposure (★) | (★★)           | Assessment of outcome (★) | Adequacy of follow up (★) |               |
| Sacco C, Petrone D, Del Manso M, et al. [24]                           | *                                        | *                                   | -                             | ★★             | *                         | -                         | ★★★★★<br>(5)  |
| Flacco ME, Soldato G, Acuti Martellucci C, et al.[25]                  | *                                        | *                                   | -                             | ★★             | *                         | *                         | ★★★★★★<br>(6) |
| Shaheen NA, Sambas R, Alenezi M, Alharbi NK, Aldibasi O, Bosaeed M[26] | -                                        | *                                   | *                             | ★★             | *                         | -                         | ★★★★★<br>(5)  |
| Nordström P, Ballin M, Nordström A[27]                                 | *                                        | *                                   | -                             | * _            | *                         | -                         | ★★★★ (4)      |
| Slezak J, Bruxvoort K, Fischer H, Broder B, Ackerson B,                | *                                        | *                                   | -                             | ★★             | *                         | -                         | ★★★★★<br>(5)  |

|                                                                                     |   |   |   |     |   |   |              |
|-------------------------------------------------------------------------------------|---|---|---|-----|---|---|--------------|
| Tartof S [28]                                                                       |   |   |   |     |   |   |              |
| Mensah AA, Lacy J, Stowe J, et al.[29]                                              | * | * | - | **  | * | * | *****<br>(6) |
| Yao MQ, Zheng QX, Xu J, et al.[30]                                                  | * | * | * | **  | * | - | *****<br>(6) |
| Pulliam JRC, van Schalkwyk C, Govender N, et al.[31]                                | - | * | * | **  | * | - | *****<br>(5) |
| Almadhi M, Alsayyad AS, Conroy R, Atkin S, Awadhi AA, Al-Tawfiq JA, AlQahtani M [3] | * | * | * | - * | * | - | *****<br>(5) |
| Al-Otaiby M, et al.[32]                                                             | * | * | - | **  | * | * | *****<br>(6) |
| Murillo-Zamora E, Mendoza-Cano O, Delgado-Enciso I, Hernandez-Suarez CM [33]        | * | * | - | **  | * | * | *****<br>(6) |
| Garduño-Orbe B, Sánchez-                                                            | * | * | - | **  | * | - | *****<br>(5) |

|                                                                           |   |   |   |     |   |   |              |
|---------------------------------------------------------------------------|---|---|---|-----|---|---|--------------|
| Rebolledo JM,<br>Cortés-Rafael M,<br>et al.[34]                           |   |   |   |     |   |   |              |
| Sánchez-Varela N,<br>Cinza-Sanjurjo S,<br>Portela-Romero<br>M [35]        | * | * | - | **  | * | * | *****<br>(6) |
| Hu R, Jiang Z,<br>Gao H, et al.[36]                                       | - | * | * | **  | * | - | *****<br>(5) |
| Quattrocchi A,<br>Tsioutis C,<br>Demetriou A, et<br>al.[37]               | * | * | - | **  | * | - | *****<br>(5) |
| Cavanaugh AM,<br>Spicer KB,<br>Thoroughman D,<br>Glick C, Winter<br>K[38] | * | * | - | **  | * | - | *****<br>(5) |
| Medić S,<br>Anastassopoulou<br>C, Lozanov-<br>Crvenković Z, et<br>al.[39] | * | * | - | * _ | * | * | *****<br>(5) |
| Pilz S, Chakeri A,<br>Ioannidis JP, et<br>al.[40]                         | * | * | * | **  | * | - | *****<br>(6) |

|                                                                                       |   |   |   |     |   |   |              |
|---------------------------------------------------------------------------------------|---|---|---|-----|---|---|--------------|
| Adrielle Dos Santos L, Filho PGG, Silva AMF, et al.[41]                               | - | * | * | **  | * | - | *****<br>(5) |
| Havervall S, Ng H, Jernbom Falk A, et al.[42]                                         | * | * | * | **  | * | - | *****<br>(6) |
| Nisha B, Dakshinamoorthy K, Padmanaban P, Jain T, Neelavarnan M.[43]                  | * | * | - | **  | * | * | *****<br>(6) |
| Levin-Rector A, Firestein L, McGibbon E, et al.[44]                                   | * | * | - | - * | * | * | *****<br>(5) |
| Sotoodeh Ghorbani S, Taherpour N, Bayat S, Ghajari H, Mohseni P, Hashemi Nazari SS[8] | * | * | - | **  | * | - | *****<br>(5) |
| Nguyen NN, Houhamdi L,                                                                | * | * | - | **  | * | * | *****<br>(6) |

|                                                         |   |   |   |    |   |   |              |
|---------------------------------------------------------|---|---|---|----|---|---|--------------|
| Hoang VT, et al.[45]                                    |   |   |   |    |   |   |              |
| Mensah AA, Campbell H, Stowe J, et al.[46]              | - | * | * | ** | * | - | *****<br>(5) |
| Ochoa-Hein E, Leal-Morán PE, Nava-Guzmán KA, et al.[47] | * | * | - | ** | * | - | *****<br>(5) |
| Jang EJ, Choe YJ, Yun GW, et al.[48]                    | * | * | - | ** | * | - | *****<br>(5) |
